# Supplementary material
Source: publisher figshare collection journal article supplement (https://gsapubs.figshare.com/ndownloader/files/37379839)
Supplement: Supplementary file 1 [file 37379839]

## Sheet: Sheet1
Partial melting model in Fig. 7B
Mineral and melt proportion in garnet peridotite (after Jourdan et al., 2007)
Melting mode modified from Walter (1998): 0.16 olivine + 0.81 clinopyroxene + 0.15 garnet = melt + 0.12 orthopyroxene
Batch partial melting equation: CL = C0 / (F + D - F * P) (Wood and Fraser, 1976)
Partition coefficient values from Mckenzie and O'Nions (1991)
	source composition (Ionov, 2004)	La	Sm	Yb
		0.91	0.37	0.49
Mode	garnet peridotite	melt	Partition coefficient values				Mode	garnet peridotite	melt	Partition coefficient values				Mode	garnet peridotite	melt	Partition coefficient values
			DLa	DSm	DYb					DLa	DSm	DYb					DLa	DSm	DYb
olivine	0.68	0.16	0.0004	0.0013	0.0015		olivine	0.66	0.16	0.0004	0.0013	0.0015		olivine	0.64	0.16	0.0004	0.0013	0.0015
opx	0.2	-0.12	0.002	0.01	0.049		opx	0.2	-0.12	0.002	0.01	0.049		opx	0.2	-0.12	0.002	0.01	0.049
cpx	0.09	0.81	0.054	0.26	0.28		cpx	0.09	0.81	0.054	0.26	0.28		cpx	0.09	0.81	0.054	0.26	0.28
garnet	0.03	0.15	0.01	0.217	4.03		garnet	0.05	0.15	0.01	0.217	4.03		garnet	0.07	0.15	0.01	0.217	4.03
bulk D-value			0.005832	0.032794	0.15692		bulk D-value			0.006024	0.037108	0.23749		bulk D-value			0.006216	0.041422	0.31806
bulk P-value			0.045064	0.242158	0.82566		bulk P-value			0.045064	0.242158	0.82566		bulk P-value			0.045064	0.242158	0.82566
Partial melting degree	La	Sm	Yb	La/Yb	Sm/Yb		Partial melting degree	La	Sm	Yb	La/Yb	Sm/Yb		Partial melting degree	La	Sm	Yb	La/Yb	Sm/Yb
0.01	59.1625	9.16467	3.0883	19.157	2.96755		0.01	58.4331	8.27992	2.04821	28.5289	4.04252		0.01	57.7215	7.55096	1.53219	37.6725	4.92821
0.02	36.5012	7.71624	3.05473	11.949	2.52599		0.02	36.2222	7.07933	2.03339	17.8137	3.48154		0.02	35.9475	6.53955	1.52388	23.5894	4.29137
0.03	26.3921	6.66315	3.02189	8.73362	2.20496		0.03	26.2459	6.18282	2.01879	13.0008	3.06264		0.03	26.1014	5.76708	1.51567	17.2211	3.80498
0.04	20.668	5.86299	2.98974	6.91296	1.96104		0.04	20.5783	5.48785	2.00439	10.2666	2.73792		0.04	20.4893	5.15782	1.50754	13.5912	3.42136
0.05	16.9843	5.23441	2.95828	5.74129	1.76941		0.05	16.9237	4.93333	1.9902	8.50353	2.47882		0.05	16.8635	4.665	1.49949	11.2461	3.11105
0.1	8.98095	3.40768	2.81037	3.19564	1.21254		0.1	8.96396	3.27746	1.92214	4.66353	1.70511		0.1	8.94704	3.15683	1.46053	6.12587	2.16142
References
Jourdan, F., Bertrand, H., Schärer, U., Blichert-Toft, J., Féraud, G. and Kampunzu, A.B., 2007. Major and trace element and Sr, Nd, Hf, and Pb isotope compositions of the Karoo large igneous province, Botswana–Zimbabwe: lithosphere vs mantle plume contribution. Journal of Petrology, 48(6), pp.1043-1077.
Walter, M.J., 1998. Melting of garnet peridotite and the origin of komatiite and depleted lithosphere. Journal of Petrology, 39(1), pp.29-60.
Wood, B.J. and Fraser, D.G., 1976. Elementary thermodynamics for geologists. Oxford University Press, USA.
McKenzie, D.A.N. and O'nions, R.K., 1991. Partial melt distributions from inversion of rare earth element concentrations. Journal of Petrology, 32(5), pp.1021-1091.
